# Supplementary material for: RNA Polymerase I Is Uniquely Vulnerable to the Small-Molecule Inhibitor BMH-21
Source: MDPI journal article supplement (doi:10.3390/cancers14225544), 2022-11-11
Supplement: s1 [file s1]

# **Scheme 1 - Pol I + BMH-21**

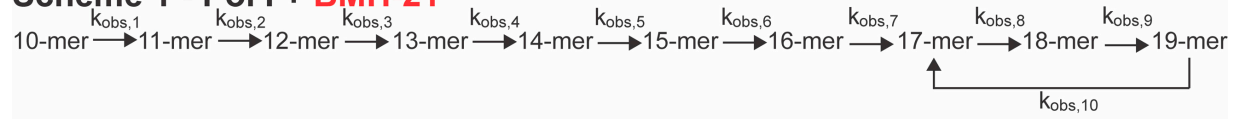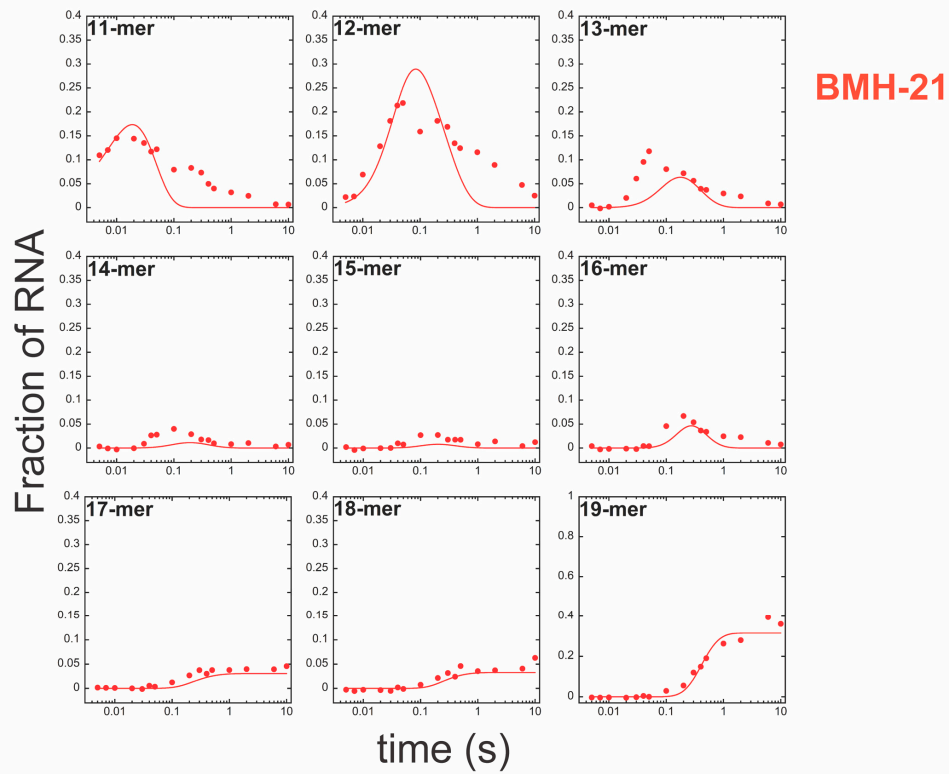

**Supplementary Figure S1.** Pol I multi-nucleotide addition in the presence of BMH-21. Representative data set of each RNA species over time fit to Scheme 1.

| Kinetic Parameter (s <sup>-1</sup> ) | Vehicle <sup>a</sup> | BMH-21 (1 μM) <sup>b</sup> |
|--------------------------------------|----------------------|----------------------------|
| $k_{obs,1,F}$                        | 10 ± 3               | 12 ± 3                     |
| $k_{obs,1,R}$                        | 24 ± 3               | 27 ± 8                     |
| $k_{obs,2,F}$                        | 30 ± 3               | 30 ± 10                    |
| $k_{obs,2,R}$                        | 17 ± 6               | 9 ± 8                      |
| $k_{obs,3,F}$                        | 34 ± 9               | 19 ± 9                     |
| $k_{obs,3,R}$                        | 50 ± 20              | 20 ± 20                    |
| $k_{obs,4,F}$                        | 50 ± 20              | 50 ± 30                    |
| $k_{obs,4,R}$                        | 40 ± 30              | 40 ± 30                    |
| $k_{obs,5,F}$                        | 40 ± 20              | 30 ± 20                    |
| $k_{obs,5,R}$                        | 20 ± 10              | 10 ± 10                    |
| $k_{obs,6,F}$                        | 30 ± 10              | 20 ± 10                    |
| $k_{obs,6,R}$                        | 40 ± 20              | 10 ± 10                    |
| $k_{obs,7,F}$                        | 23 ± 8               | 15 ± 5                     |
| $k_{obs,7,R}$                        | 12 ± 6               | 7 ± 5                      |
| $k_{obs,8,F}$                        | 400000 ± 900000      | 11 ± 5                     |
| $k_{obs,8,R}$                        | 600000 ± 900000      | 8 ± 8                      |
| $k_{obs,9,F}$                        | 10 ± 4               | 10 ± 9                     |
| $k_{obs,9,R}$                        | 0.8 ± 0.5            | 0.94 ± 0.02                |

**Supplemental Table S1.** Resultant parameter values from Pol II vehicle- and BMH-21-treated multi-nucleotide time courses fit to Scheme 3.

<sup>a</sup>Vehicle-treated time courses were fit to Scheme 3. Pol II multi-nucleotide addition time courses were collected in triplicate and globally fit to their respective schemes. The resultant mean and standard deviation of the optimized parameters are reported. <sup>b</sup>BMH-21-treated time courses were fit to Scheme 3. Pol II multi-nucleotide addition time courses were collected in triplicate and globally fit to their respective schemes. The resultant mean and standard deviation of the optimized parameters are reported.

## Detailed Materials

**Buffers:** All buffers were made with Millipore filtered deionized water and filtered using Millipore 0.22  $\mu\text{m}$  filters (MilliporeSigma, Billerica, MD). Transcription reactions proceeded in buffer A [52]: 40 mM KCl, 20 mM Tris-Acetate (OAc) pH 7.9 at 25 °C, 2 mM dithiothreitol, 0.2 mg/ml<sup>-1</sup> bovine serum albumin.

**Proteins:** Pols I, II, and III were purified from *Saccharomyces cerevisiae* as detailed previously [49, 50]. The identities of Pol fractions were verified with Coomassie Blue SDS PAGE, western blots, and mass spectrometry [50]. RNase A (catalog # LS002132; Worthington Biochemical, Lakewood, NJ) was dialyzed into buffer A with 20% glycerol. Concentration was determined by spectroscopic assay in denaturing protein measurement buffer as previously described [54].

**Nucleic acids:** The following nucleic acids were purchased from Integrated DNA Technologies (Cedar Rapids, IA):  
DNA non-template strand (DNA<sub>nt</sub>) 5'  
ACCAGCAGGCCGATTGGGATGGGTATTCCCTCCTGCCTCTCGATGGCTGTAAGTATCCTATAGG  
RNA 5'-AUCGAGAGG  
DNA template strand (DNA<sub>t</sub>) 5'  
CCTATAGGATACTTACAGCCATCGAGAGGCAGGAGGGAATACCCATCCCAATCGGCCTGCTGGT

**NTP substrates:** Adenosine triphosphate (ATP) and guanosine triphosphate (GTP) were purchased from Sigma Aldrich as lyophilized sodium salts. ATP and GTP salts were dissolved in buffer A, filtered with Millipore 0.22  $\mu\text{m}$  filters, and dialyzed into buffer A as previously detailed [52].

**Chemical quenched-flow time courses:** For multi-nucleotide addition experiments, two solutions were rapidly mixed together in the instrument: EC mix and NTP mix. The EC mix contained ~ 16 nM Pol I, 162.75 nM RNA, 54.26 nM DNA<sub>t</sub>, 162.75 nM DNA<sub>nt</sub>, 5 nM  $\alpha$ -<sup>32</sup>P-CTP, 100  $\mu\text{M}$  Mg(OAc)<sub>2</sub>, and 1.1 mM EDTA. The NTP mix contained 2 mM ATP, 2 mM GTP, 18 mM Mg(OAc)<sub>2</sub>, and 0.05 mg/mL<sup>-1</sup> heparin. The EC mix and NTP mix are mixed 1:1, allowed to incubate for a varying amount of time (0.005 – 10 s) before being quenched in 1 M HCl. An aliquot of the quenched reaction sample is mixed with equalizing HCl and neutralization buffer.

**Gel electrophoresis:** RNAs produced from multi-nucleotide addition and EC stability experiments were separated by denaturing polyacrylamide sequencing gel electrophoresis. Samples were boiled at 95 °C for 5 min and ran on a 28 % acrylamide (19:1, acrylamide:bis-acrylamide), 7 M urea gel in 1X TBE.
